# Supplementary material for: Willingness to pay for community-based health insurance and associated factors among rural households of Bugna District, Northeast Ethiopia
Source: PubMed Central journal article supplement (PMC6346545; doi:10.1186/s13104-019-4091-9), 2019-01-24
Supplement: 13104_2019_4091_MOESM1_ESM.pdf [file 13104_2019_4091_MOESM1_ESM.pdf]

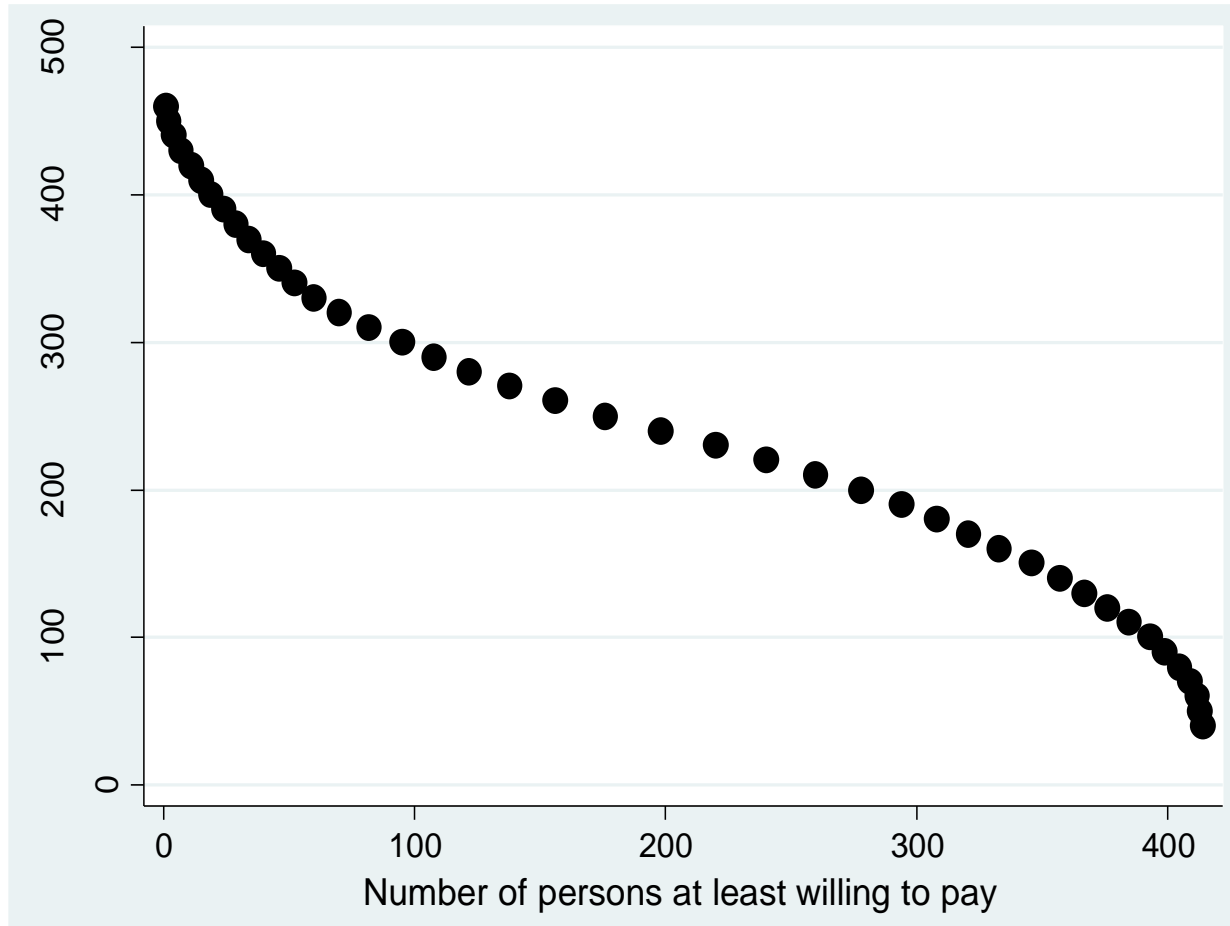

Fig.S1: the distribution of maximum willing ness to pay for the newly proposed community based health insurance scheme in the rural households of Bugna district, 2016
