# Supplementary material for: Willingness to pay for community-based health insurance and associated factors among rural households of Bugna District, Northeast Ethiopia
Source: PubMed Central journal article supplement (PMC6346545; doi:10.1186/s13104-019-4091-9), 2019-01-24
Supplement: 13104_2019_4091_MOESM2_ESM.pdf [file 13104_2019_4091_MOESM2_ESM.pdf]

**Table S1: A bivariable of proportion of WTP for CBHI and mean amount with 95% CI**

| Variables                        | Description                       | Mean amount of MWTP in ETB (95% CI) | Proportion of WTP (mean amount of 233 ETB) |                     |
|----------------------------------|-----------------------------------|-------------------------------------|--------------------------------------------|---------------------|
|                                  |                                   |                                     | % of yes (95% CI)                          | % of No (95% CI)    |
| Sex of the respondent            | Male                              | 221.65(207.27, 236.03)              | 82.25(76.04, 87.13)                        | 17.75(12.86, 23.95) |
|                                  | Female                            | 239.66(229.49, 249.83)              | 73.86(63.61, 82.04)                        | 26.14(17.95, 36.38) |
| Age of the respondents           | ≤ 29 years                        | 221.46(206.40, 236.52)              | 74.02(63.00, 82.66)                        | 25.98(17.33, 36.99) |
|                                  | 30-39 years                       | 228.00(215.36, 240.63)              | 75.82(65.88, 83.58)                        | 24.18(16.41, 34.11) |
|                                  | 40-49 years                       | 240.29(221.74, 258.84)              | 83.07(71.80, 90.44)                        | 16.93(9.5, 28.19)   |
|                                  | 50-59 years                       | 275.67(245.81, 305.53)              | 96.66(79.09, 99.5)                         | 3.34(0.4, 20.90)    |
|                                  | 60 years and above                | 228.23(185.12, 271.34)              | 81.81(47.25, 95.76)                        | 18.19(4.2, 52.74)   |
| Marital status of respondents    | Single                            | 199.64(176.24, 223.03)              | 66.67(39.58, 85.92)                        | 33.33(14.07, 60.42) |
|                                  | Married                           | 239.91(230.65, 249.16)              | 81.81(76.26, 86.30)                        | 18.19(13.69, 23.73) |
|                                  | Windowed                          | 233.33(161.61, 305.05)              | 60.00(16.74, 91.79)                        | 40.00(8.2, 83.25)   |
|                                  | Divorced                          | 203.95(177.06, 230.84)              | 69.56(47.86, 85.05)                        | 30.44(14.94, 52.13) |
| Occupation of the respondents    | Farmer                            | 235.08(225.32, 244.84)              | 78.46(72.09, 83.70)                        | 21.54(16.29, 27.90) |
|                                  | Housewife                         | 209.38(189.18, 229.58)              | 76.47(59.16, 87.93)                        | 23.53(12.06, 40.83) |
|                                  | Merchant                          | 301.89(276.23, 327.55)              | 91.42(76.15, 97.27)                        | 8.58(2.7, 23.84)    |
|                                  | Daily labourer                    | 131.66(76.90, 186.42)               | 25.00(2.33, 57.43)                         | 75.00(13.4, 97.33)  |
|                                  | Students                          | 187.89(163.76, 212.02)              | 66.67(31.35, 89.74)                        | 33.33(31.35, 89.74) |
| Educational status               | Unable to read & write            | 216.37(206.39, 226.35)              | 72.59(64.40, 79.49)                        | 27.41(20.50, 35.59) |
|                                  | Read and write                    | 241.83(223.02, 260.65)              | 84.48(72.59, 91.79)                        | 15.52(8.2, 27.40)   |
|                                  | Primary education                 | 267.44(247.09, 287.79)              | 88.40(78.34, 94.14)                        | 11.60(5.85, 21.65)  |
|                                  | Secondary education               | 227.89(188.19, 267.59)              | 83.33(50.41, 96.09)                        | 16.67(3.90, 49.58)  |
| Family size                      | ≤ 5                               | 211.03(201.12, 220.95)              | 66.41(57.94, 73.95)                        | 33.59(26.04, 42.05) |
|                                  | Greater than 5                    | 256.78(243.97, 269.58)              | 92.14(86.31, 95.61)                        | 7.86(4.38, 13.68)   |
| Wealth quintile of the household | Poor (1 <sup>st</sup> quintile)   | 205.58(195.16, 216.00)              | 75.42(66.78, 82.40)                        | 24.58(17.59, 33.21) |
|                                  | Medium (2 <sup>nd</sup> quintile) | 241.60(281.87, 322.97)              | 79.16(69.79, 86.20)                        | 20.84(13.79, 30.20) |
|                                  | Rich (3 <sup>rd</sup> quintile)   | 302.42(281.87, 322.97)              | 88.33(77.31, 94.38)                        | 11.67(5.61, 22.68)  |
| Chronic illness                  | No                                | 231.56(222.06, 240.47)              | 78.66(72.78, 83.56)                        | 21.34(16.43, 27.21) |
|                                  | Yes                               | 242.80(223.10, 262.49)              | 83.67(70.37, 91.70)                        | 16.33(8.29, 29.62)  |
| Awareness about the CBHIS        | Poor awareness                    | 218.83(210.44, 227.21)              | 76.09(69.73, 81.47)                        | 23.91(18.52, 30.26) |
|                                  | Good awareness                    | 294.00(273.47, 314.45)              | 89.85(80.06, 95.12)                        | 10.15(4.87, 19.93)  |
| Social trust among them          | Poor trust                        | 226.89(207.23, 246.55)              | 77.14(60.16, 88.29)                        | 22.86(11.70, 39.83) |
|                                  | Good trust                        | 234.41(225.25, 243.56)              | 79.91(74.31, 84.54)                        | 20.09(15.45, 25.68) |
