# Supplementary material for: Willingness to pay for community-based health insurance and associated factors among rural households of Bugna District, Northeast Ethiopia
Source: PubMed Central journal article supplement (PMC6346545; doi:10.1186/s13104-019-4091-9), 2019-01-24
Supplement: 13104_2019_4091_MOESM3_ESM.pdf [file 13104_2019_4091_MOESM3_ESM.pdf]

Table S2: Marginal effect of factors associate with WTP for CBHI after Tobit econometrical analysis in Bugna district, 2016.

| Parameter for MWTP                                      | category | dy/dx   | Std.<br>Err. | Z     | P> z    | [95% CI.]     |
|---------------------------------------------------------|----------|---------|--------------|-------|---------|---------------|
| Age                                                     | N        | 0.0010  | 0.0007       | 1.38  | 0.169   | -0.002, 0.002 |
| Households family size                                  | N        | 0.0112  | 0.0045       | 2.47  | 0.013*  | 0.002, 0.020  |
| Educational status                                      | D        | 0.0730  | 0.0139       | 5.26  | 0.000** | 0.045, 0.100  |
| awareness about the<br>CBHIS                            | D        | 0.0707  | 0.0137       | 5.14  | 0.000** | 0.043, 0.097  |
| Social trust among them                                 | D        | 0.0374  | 0.0252       | 1.48  | 0.138   | -0.012, 0.087 |
| Chronic illness in<br>household member                  | D        | -0.0023 | 0.0217       | 0.11  | 0.915   | -0.040, 0.044 |
| History of any Illness in<br>household member           | D        | 0.0671  | 0.0165       | 4.07  | 0.000** | 0.034, 0.099  |
| Home distance from health<br>centre or hospital in time | D        | 0.0074  | 0.0072       | 1.03  | 0.303   | -0.006, 0.021 |
| Perceived health status                                 | D        | -0.0068 | 0.0116       | -0.59 | 0.557   | -0.029, 0.015 |
| Wealth quintile of<br>the household                     | D        | 0.0777  | 0.0113       | 6.87  | 0.000   | 0.055, 0.099  |

**Note: - \*\*significant with p-value  $\leq 0.01$ ; \*significant with p-value  $\leq 0.05$ ; D= Dummy variable (0, 1); N=Numeric value;**
